# Supplementary material for: A Combined Cyto- and Histopathological Diagnostic Approach Reduces Time to Diagnosis and Time to Therapy in First Manifestation of Metastatic Spinal Disease: A Cohort Study
Source: MDPI journal article supplement (doi:10.3390/cancers16091659), 2024-04-25
Supplement: s1 [file s1]

**Table S1.** Demographic and disease characteristics of the overall sample, the CP/HP- and HP group.

|                                       | Overall<br>(n=200) | CP/HP group<br>(n=61) | HP group<br>(n=139) | <i>p</i> -value |
|---------------------------------------|--------------------|-----------------------|---------------------|-----------------|
| Age in years                          |                    |                       |                     |                 |
| Mean (SD)                             | 65.3 (12.5)        | 64.4 (13.6)           | 65.7 (12.1)         |                 |
| Median, min-max                       | 66, 21-86          | 65, 20-86             | 67, 21-85           | 0.497           |
| Sex (n, %)                            |                    |                       |                     |                 |
| Male                                  | 78, 39.0%          | 38, 62.3%             | 84, 60.4%           |                 |
| Female                                | 122, 61.0%         | 23, 37.7%             | 55, 39.6%           | 0.804           |
| Time to diagnosis (TTD)               |                    |                       |                     |                 |
| Mean (SD)                             | 11.7 (8.9)         | 8.5 (3.6)             | 13.1 (10.1)         |                 |
| Median, min-max                       | 9, 0-63            | 8, 2-16               | 9, 0-63             | <0.001          |
| Time to tumor-specific therapy (TTT)  |                    |                       |                     |                 |
| Mean (SD)                             | 26.5 (21.7)        | 21.0 (15.8)           | 28.6 (23.3)         |                 |
| Median, min-max                       | 21, 0-177          | 17.5, 0-73            | 22, 0-177           | 0.034           |
| Solid malignancy (n, %)               | 145, 72.5%         | 40, 65.6%             | 105, 75.5%          | 0.146           |
| Hemic malignancy (n, %)               | 50, 25.0%          | 14, 22.9%             | 36, 25.9%           | 0.658           |
| Prostate cancer (n, %)                | 15, 7.5%           | 5, 8.2%               | 10, 7.2%            | 0.804           |
| Breast cancer (n, %)                  | 20, 10.0%          | 9, 14.8%              | 11, 7.9%            | 0.138           |
| Bronchopulmonal adenocarcinoma (n, %) | 29, 14.5%          | 8, 13.1%              | 21, 15.1%           | 0.712           |
| Multiple myeloma, (n, %)              | 42, 21.0%          | 14, 23.0%             | 28, 20.1%           | 0.654           |
| Undifferentiated carcinoma (n, %)     | 13, 6.5%           | 3, 4.9%               | 10, 7.2%            | 0.548           |

CP - Cytopathology, HP – Histopathology, SD - standard deviation, min - minimum, max – maximum, TTD - Time to Diagnosis, TTT - Time to Treatment.
